# Supplementary material for: Intestinal permeability in patients undergoing stem cell transplantation correlates with systemic acute phase responses and dysbiosis
Source: PubMed Central journal article supplement — Blood Adv. 2023 Apr 24;7(17):5137–51. doi: 10.1182/bloodadvances.2023009960 (PMC10480541; doi:10.1182/bloodadvances.2023009960), 2023-04-24

Supplemental Figure 1. (A) Baseline urine lactulose (blue) and rhamnose (red) levels prior to administration of lactulose/rhamnose solution in 20 healthy control children. (B) Representative agarose gel for zonulin allelic discrimination. PCR products from primers A/B were run in Lanes 1 and 3, and products from primers C/D run in Lanes 2 and 4. Ladder marked with 1757 bp fragment, which represents Hp1 allele, 3481 bp and 349 bp fragments, representing Hp2 allele. Patient X's genotype is 1-1 and Patient Y's genotype is 1-2. (C) Baseline L:R Ratio by Age at BMT in years. (D) Trajectory of L:R ratio in patients who received total body irradiation (TBI). (E) Trajectory of L:R ratio in patients who had high baseline L:R ratios. L:R ratios at Day+7 (F, D7) and Day+30 (G, D30) in subjects who did or did not develop a bloodstream infection (BSI) within 7 days of L:R sample collection.

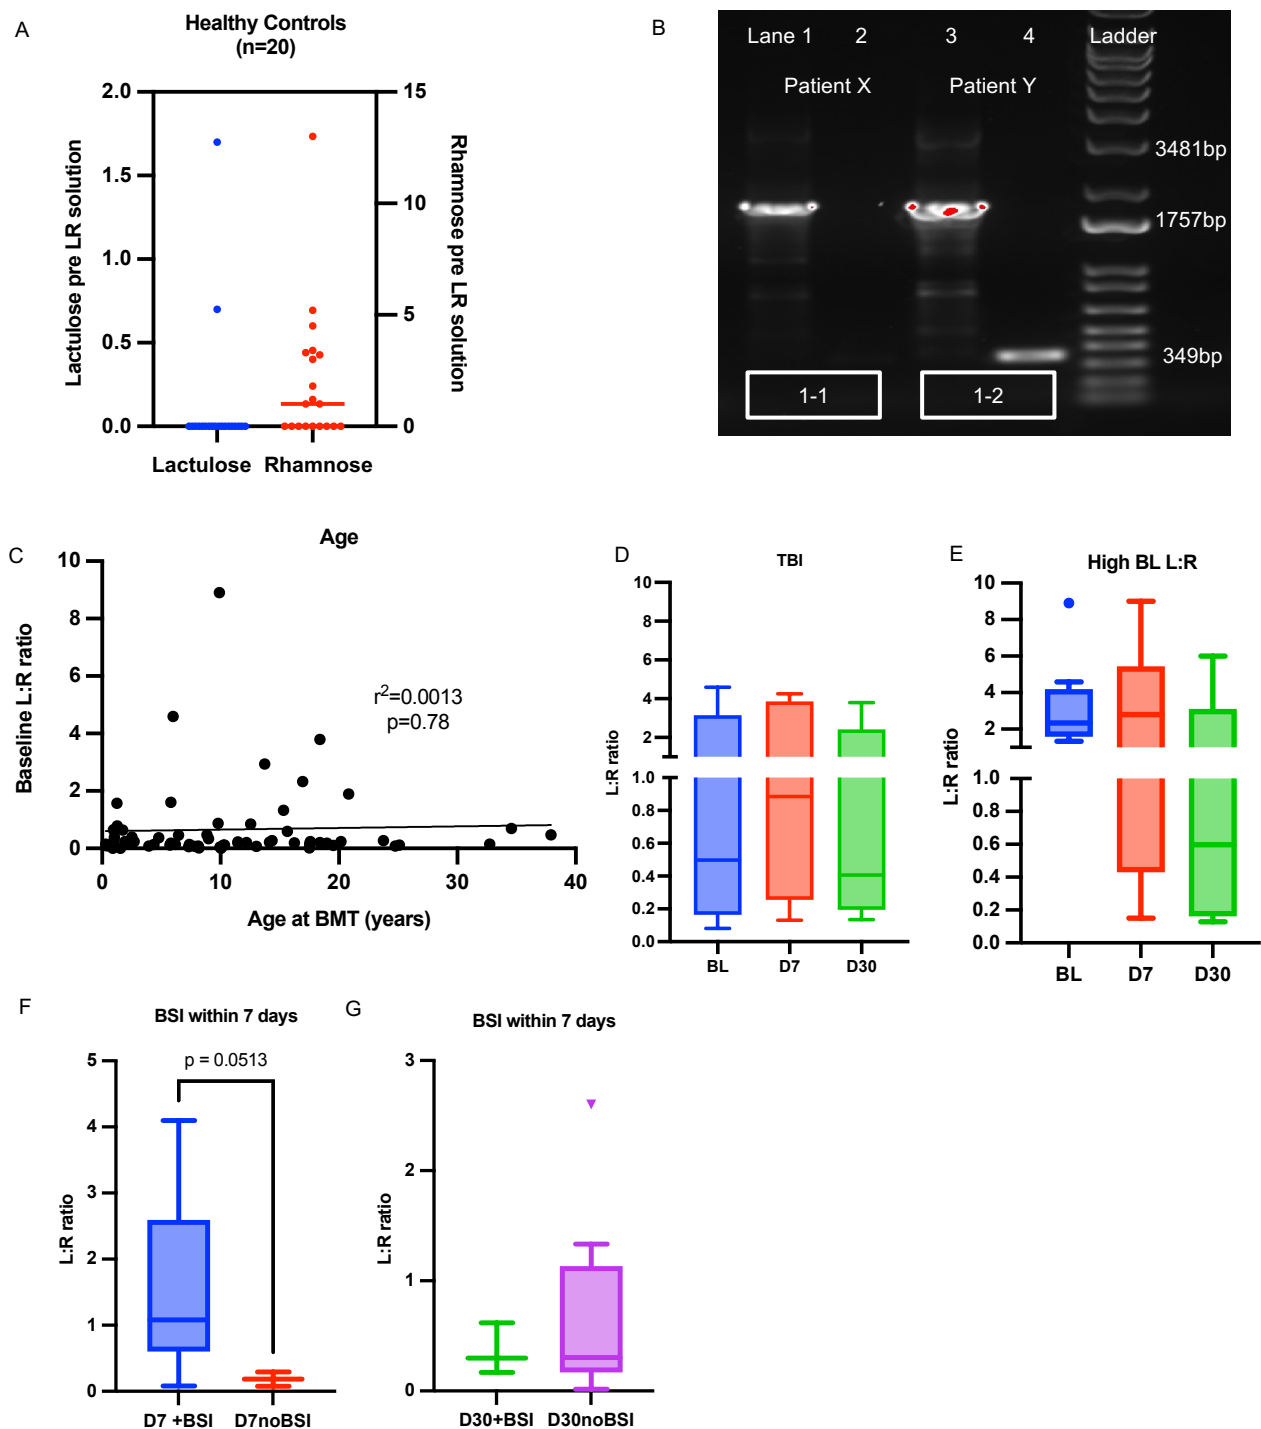

Supplemental Figure 2. Effect size of microbiome composition at Day+7 (A) and Day+30 (B) of subjects with abnormally elevated (blue) and normal, not elevated (red) intestinal permeability. Plasma (C) ferritin and (D) LBP levels in post-HSCT recipients at baseline (BL), 14 and 7 days prior to (D-14, D-7) day of documented bloodstream infection (DOE, date of event), and 7 days after infection (D+7). (E) Individual plasma LBP and ferritin levels.

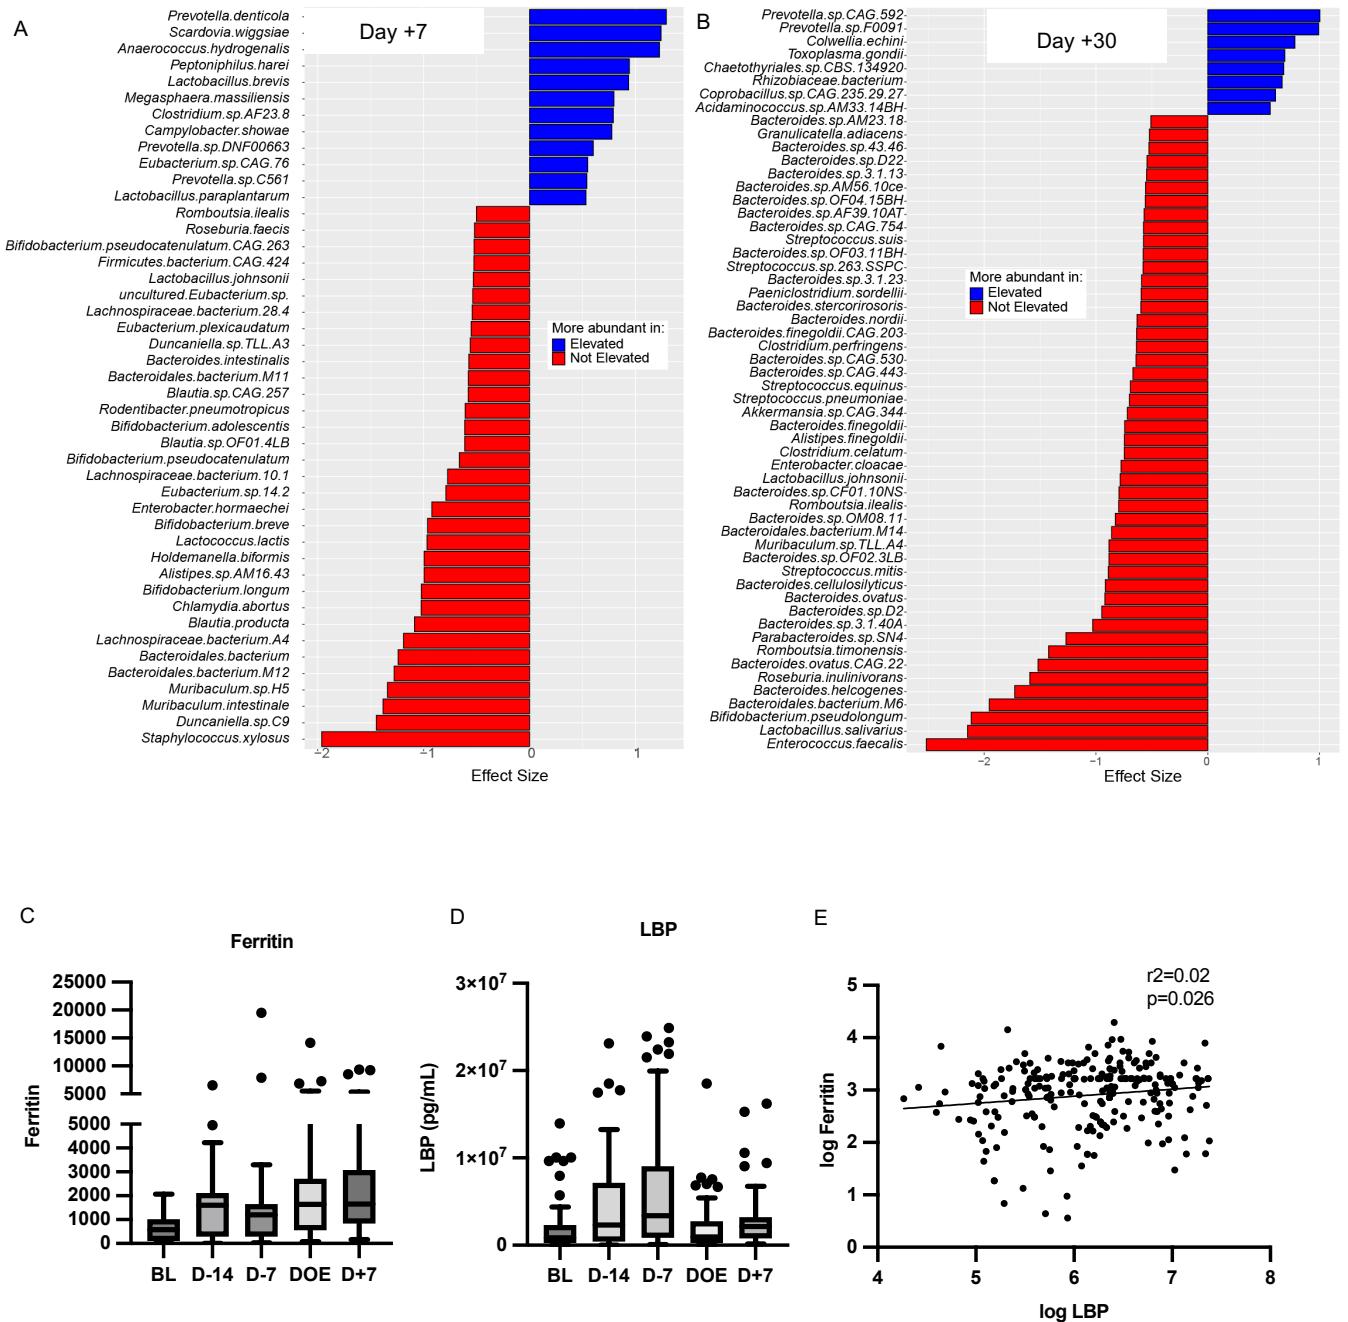

Supplement: BLOODA_ADV-2023-009960-mmc1.pdf [file BLOODA_ADV-2023-009960-mmc1.pdf]
